# Supplementary material
Source: PubMed Central journal article supplement (PMC2822879)
Supplement: NIHMS173959-supplement-1_si_001.pdf [file NIHMS173959-supplement-1_si_001.pdf]

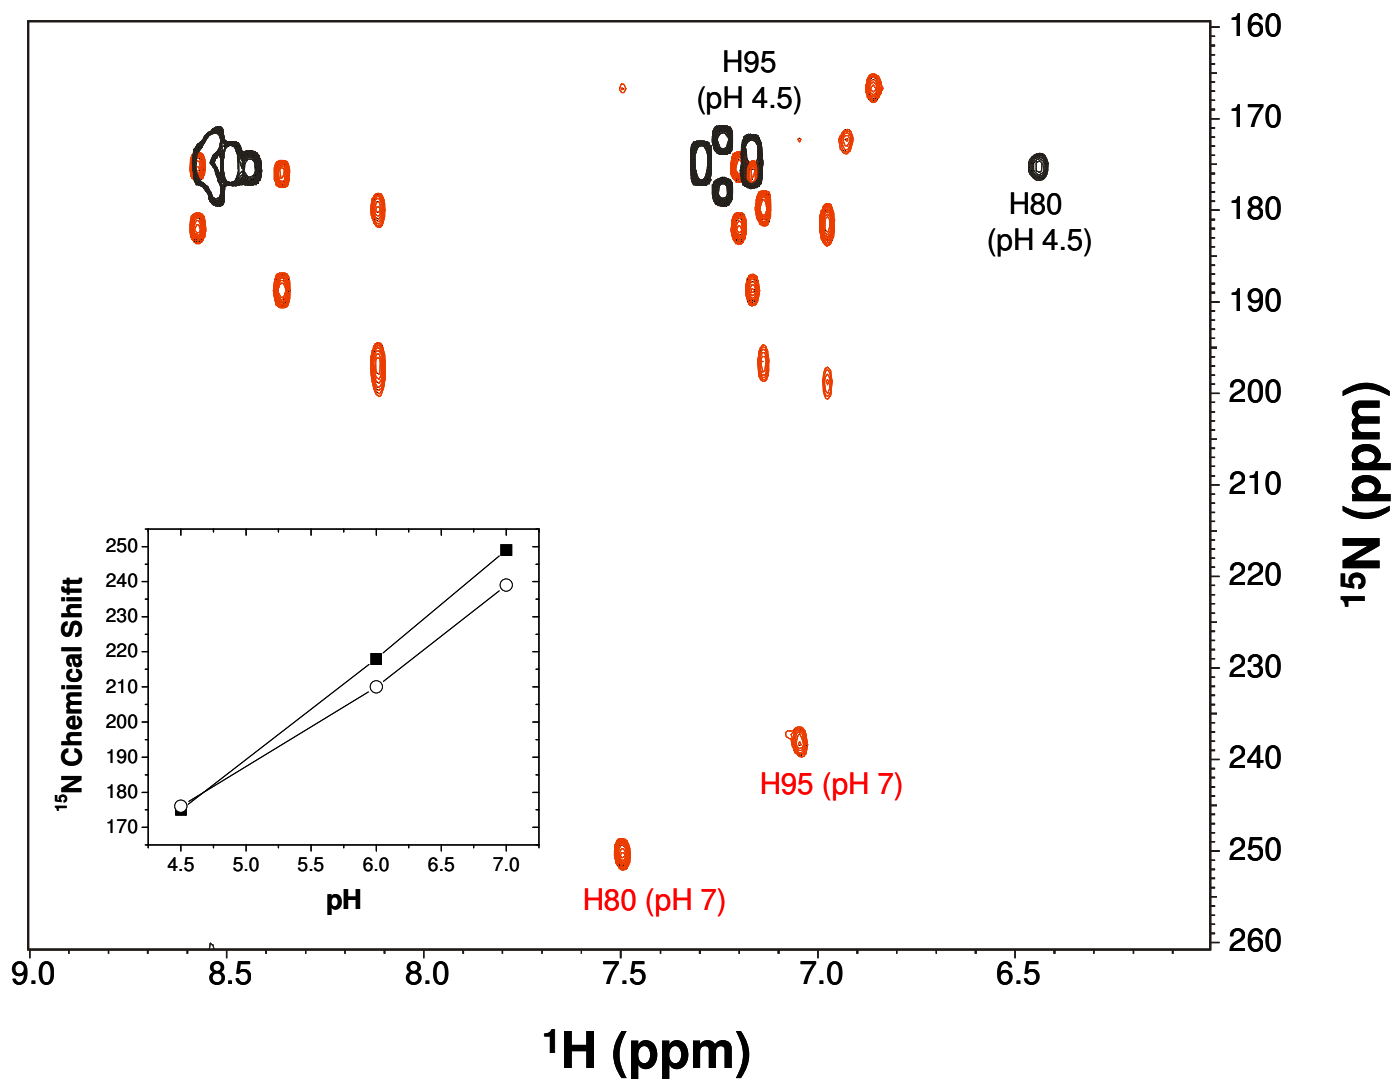

**Supplemental Fig. 1:** 2D  $^{15}\text{N}$ - $^1\text{H}$  LR-HMQC spectrum of delipidated AtrpBP1 at pH 4.5 (black) and pH 7.0 (red). The  $^{15}\text{N}_{\epsilon 2}$  resonances of H80 and H95 are marked and exhibit large pH-dependent chemical shift changes. Inset shows a plot of  $^{15}\text{N}_{\epsilon 2}$  resonance frequency for H80 (black squares) and H95 (open circles) vs. pH.
